# Supplementary material for: Nucleoporin 153 regulates estrogen-dependent nuclear translocation of endothelial nitric oxide synthase and estrogen receptor beta in prostate cancer
Source: PubMed Central journal article supplement (PMC6021351; doi:10.18632/oncotarget.25462), 2018-06-15
Supplement: oncotarget-09-27985-s001.pdf [file oncotarget-09-27985-s001.pdf]

## Nucleoporin 153 regulates estrogen-dependent nuclear translocation of endothelial nitric oxide synthase and estrogen receptor beta in prostate cancer

### SUPPLEMENTARY MATERIALS

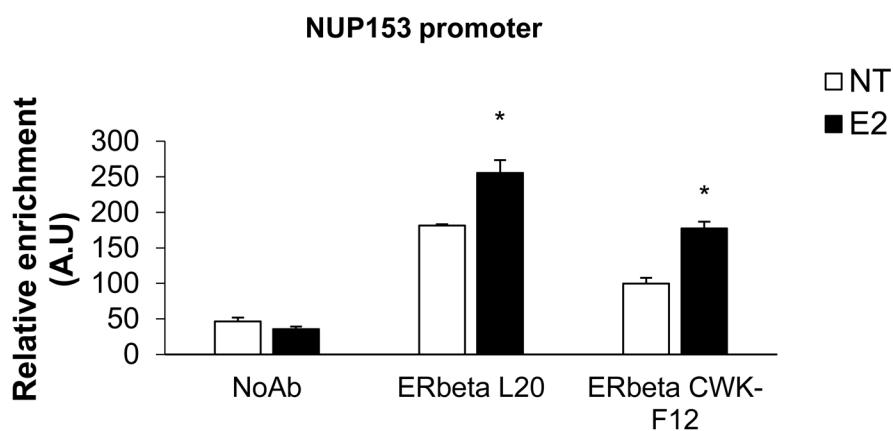

**Supplementary Figure 1: ChIP analysis of Nup153 promoter with antibodies to ER $\beta$  L-20 (4 $\mu$ g), ER $\beta$  CWK-F12 (3 $\mu$ g) and no Antibody (NoAb), as control, in prostate cancer cells before and after estradiol treatment (NT and E<sub>2</sub>, respectively). Data represent the mean  $\pm$  SEM. \*  $p < 0.05$  E<sub>2</sub> vs NT.**

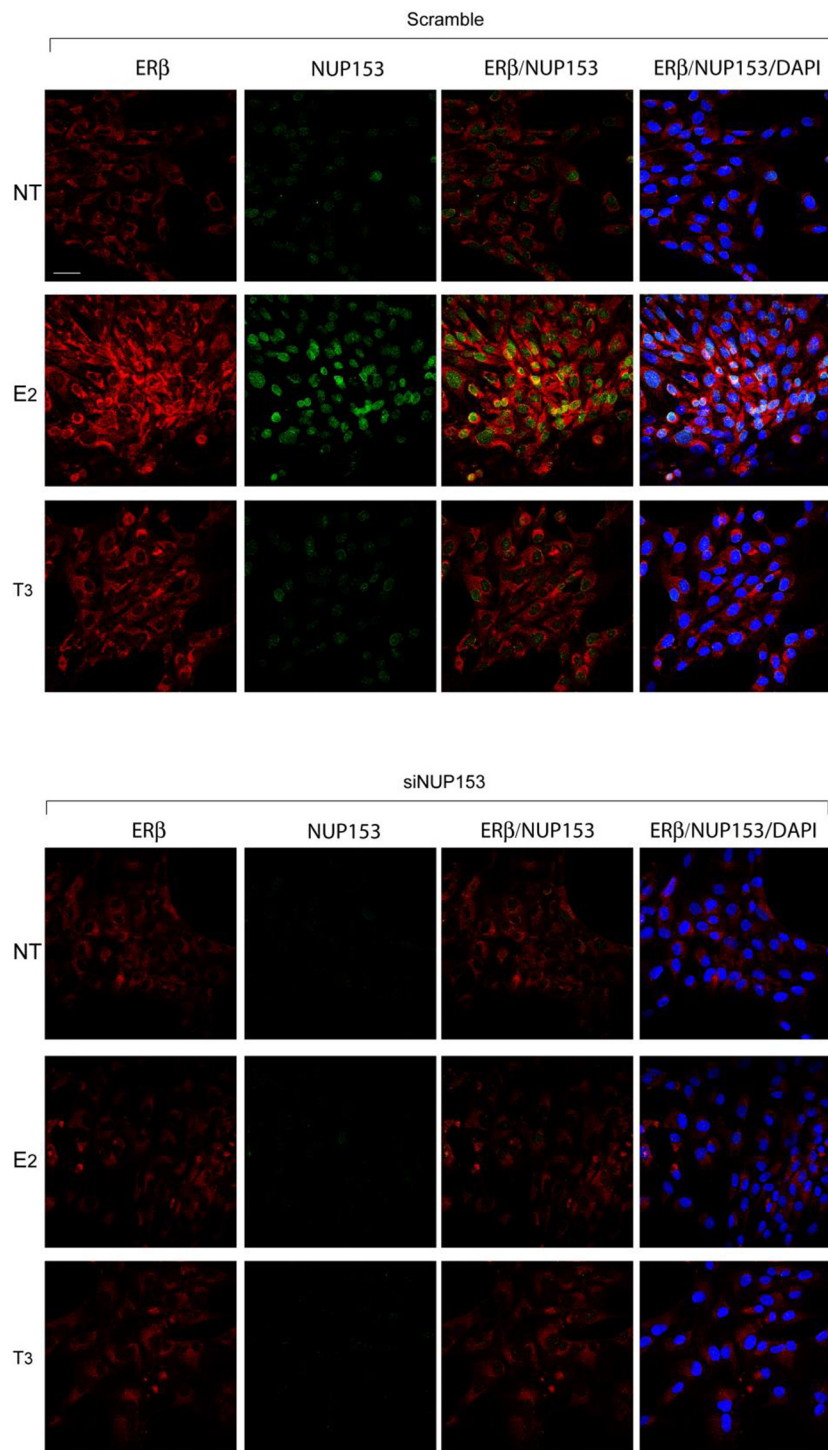

**Supplementary Figure 2: Representative confocal microscopy images showing Nup153 (H-161; green) and ERβ (CWK-F12; red) expression in PCa cells before and after Nup153 depletion (lower panels), untreated or treated with E<sub>2</sub> (10<sup>-7</sup>M, 3h 45min) or T<sub>3</sub> (10<sup>-7</sup>M, 3h 45min). Cells silenced for Nup153 (60nM oligos mix) or treated with scramble control oligo were analysed at 48h post-transfection. T<sub>3</sub> treatment served as control of ERβ estrogen response specificity. Nuclei were counterstained with DAPI (blue).**
